# Supplementary material for: Genotype and Gene Expression Associations with Immune Function in Drosophila
Source: PLoS Genet. 2010 Jan 8;6(1):e1000797. doi: 10.1371/journal.pgen.1000797 (PMC2793509; doi:10.1371/journal.pgen.1000797)
Supplement: Table S5 — Loading for expression of E. faecalis and S. marcescens induced effector genes onto the first principal component of effector expression. (0.02 MB XLS) [file pgen.1000797.s006.xls]

## Sheet: Sheet1
Table S5: loadings onto the first princpal component of effector expression for Sm-induced and Ef-induced samples
	Loadings
Gene	Sm-induced	Ef-induced
AttA	-6.60701	-4.8376
AttB	-4.68899	-1.14188
AttC	-12.3077	-11.4812
AttD	1.15832	2.75536
Bc	3.08852	3.33443
Catsup	3.18917	3.14531
CecA1	-3.74533	-0.0789436
CecA2	-9.64615	-4.35239
CecB	1.5163	3.18827
CecC	-0.833583	2.82678
CG1102	2.79925	1.52243
CG15293	1.83593	-1.26365
CG15825	-0.129415	-2.69165
CG3066	2.45255	2.15018
CG6426	2.98528	0.437949
CG8913	-1.18514	-3.12258
Ddc	4.07658	4.1503
Def	-7.2885	-3.68275
DoxA2	4.28486	4.21107
DoxA3	3.45359	3.42458
Dpt	3.17529	3.49243
DptB	-14.9804	-14.4907
Dro	2.21659	2.95123
dro2	3.23962	3.35865
dro3	2.40665	2.40644
dro4	3.51601	4.77943
dro5	2.31362	3.15379
dro6	3.40967	3.46064
Drs	-5.8882	-8.01969
Drsl	3.24043	3.42156
Hml	2.72359	3.21305
IM1	-2.29232	-4.97779
IM10	-1.11646	-7.36624
IM2	-1.82315	-6.92384
IM23	-3.2252	-11.7416
IM3	0.610537	-2.22125
IM4	-2.05281	-6.28825
LysB	5.18743	4.46137
LysC	3.76662	3.0049
LysD	4.61923	3.34284
LysE	5.77762	4.77533
LysP	4.46086	4.35394
LysS	3.24112	3.07001
LysX	3.61541	3.61879
Mtk	-13.5564	-14.8132
ple	3.43931	3.77574
Pu	0.657645	1.95792
Spn27A	2.62477	2.61681
Tig	3.18369	3.0018
TotA	-5.88036	-3.38977
TotB	1.9981	2.92417
TotC	-10.1468	-4.28444
TotF	3.26064	3.28408
TotM	-11.8907	-6.93945
TotX	-2.3932	0.725499
TotZ	3.2976	3.43281
Tsf1	3.09851	3.01381
Tsf2	3.2666	3.34119
Tsf3	3.39275	3.74161
yellowf	1.8618	1.28198
yellowf2	3.23578	3.00053
